# Supplementary material for: Structural and Biochemical Characterization of the Flavin-Dependent Siderophore-Interacting Protein from Acinetobacter baumannii
Source: PubMed Central journal article supplement — ACS Omega. 2021 Jul 6;6(28):18537–47. doi: 10.1021/acsomega.1c03047 (PMC8296543; doi:10.1021/acsomega.1c03047), 2021-07-06
Supplement: ao1c03047_si_001.pdf [file ao1c03047_si_001.pdf]

# Structural and Biochemical Characterization of the Flavin-Dependent Siderophore-Interacting Protein from *Acinetobacter baumannii*

Hannah Valentino<sup>1</sup>, David A. Korasick<sup>2</sup>, Tabbetha J. Bohac<sup>3</sup>, Justin A. Shapiro<sup>3</sup>, Timothy A. Wencewicz<sup>3\*</sup>, John J. Tanner<sup>2,4\*</sup>, and Pablo Sobrado<sup>1\*</sup>

<sup>1</sup>Department of Biochemistry, Virginia Tech, Blacksburg, VA, 24061, USA

<sup>2</sup>Department of Biochemistry, University of Missouri, Columbia, MO 65211, USA

<sup>3</sup>Department of Chemistry, University of Missouri, Columbia, Missouri 65211, USA

<sup>4</sup>Department of Chemistry, Washington University in Saint Louis, St. Louis, Missouri 63130, USA

## Supplemental Materials

### Table of Contents

|           |                                                | Page |
|-----------|------------------------------------------------|------|
| Figure S1 | SDS-PAGE of purification samples               | S2   |
| Figure S2 | UV-Vis spectrum of oxidized BauF               | S3   |
| Figure S3 | Supernatant and wash samples with reduced BauF | S4   |
| Figure S4 | UV-Vis spectrum of blue-gray protein elution   | S5   |
| Figure S5 | Supernatant exposed to different conditions    | S6   |
| Figure S6 | BauF steady-state activity with NADH           | S7   |

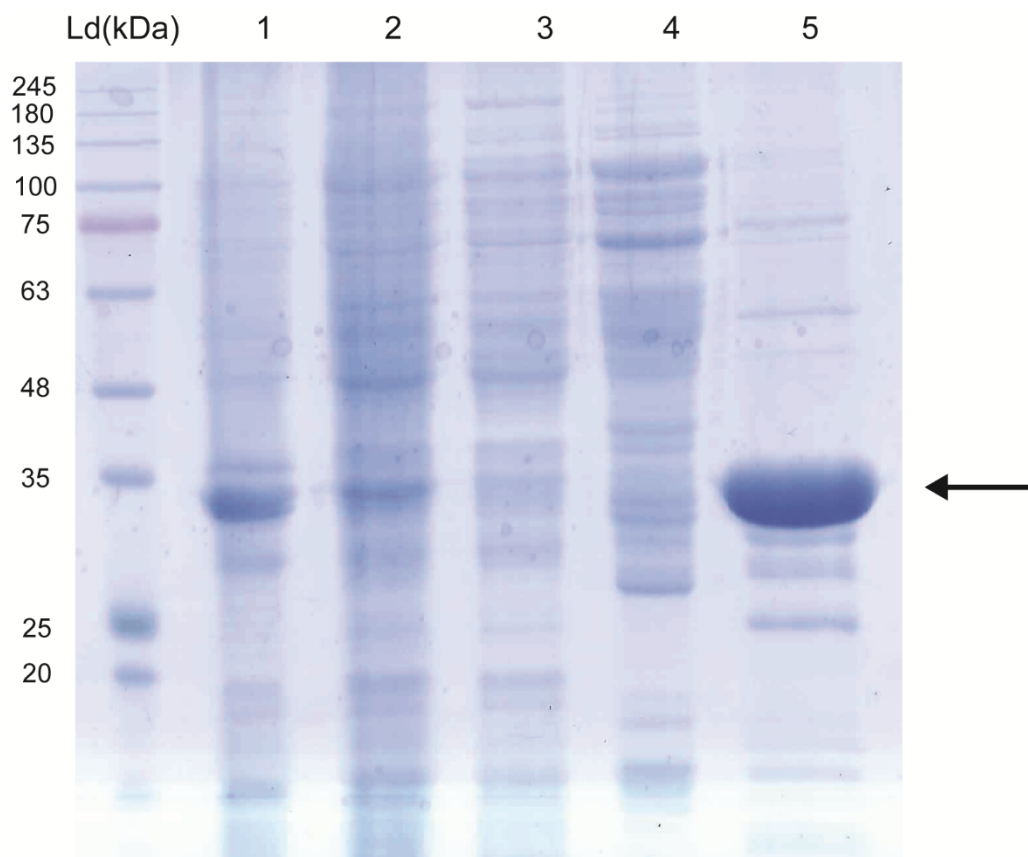

**Figure S1.** BauF purification with immobilized metal affinity chromatography (IMAC). Lane 1) lysate pellet, 2) lysate supernatant, 3) flow-through, 4) 30 mM imidazole wash, and 5) 150 mM imidazole elution. The molecular weight of BauF is 33 kDa (*black arrow*).

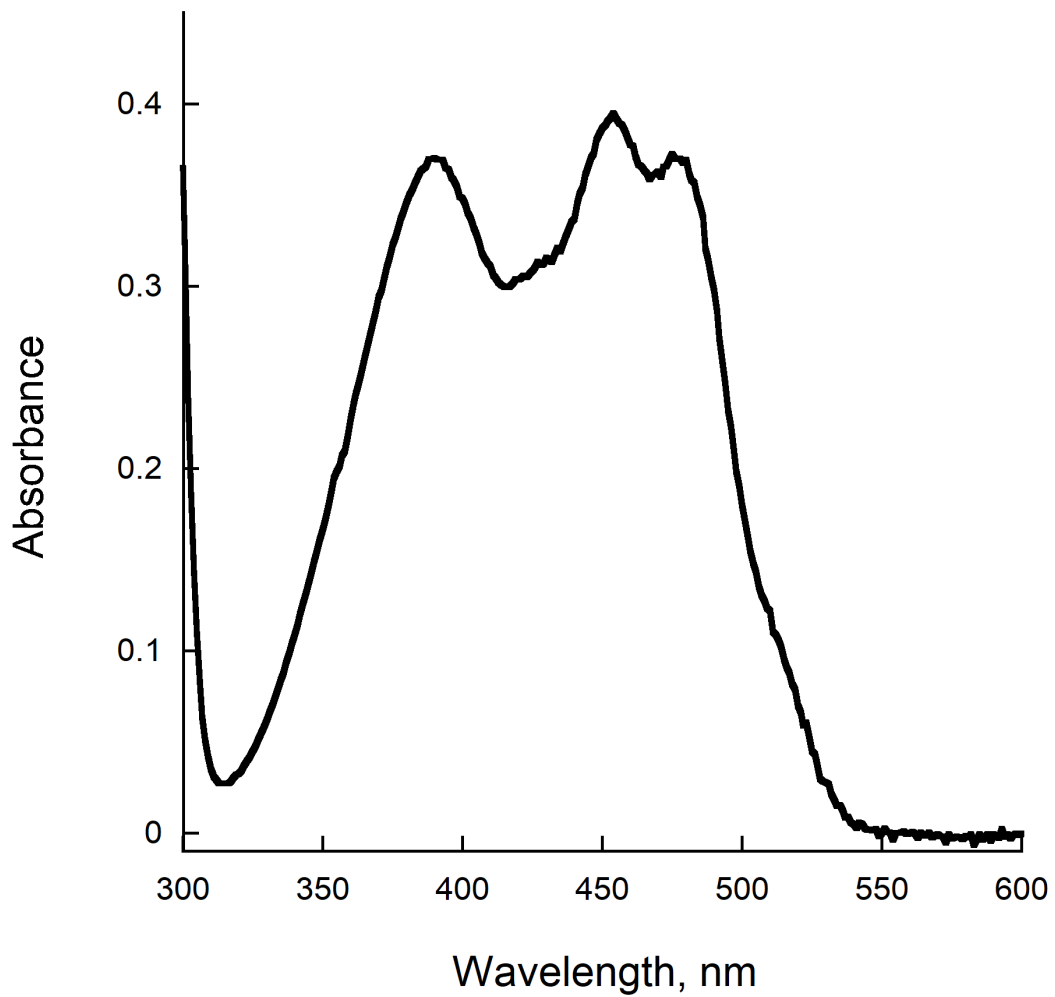

**Figure S2.** UV-visible spectrum of 37  $\mu$ M BauF in 25 mM HEPES pH 7.5 100 mM NaCl.

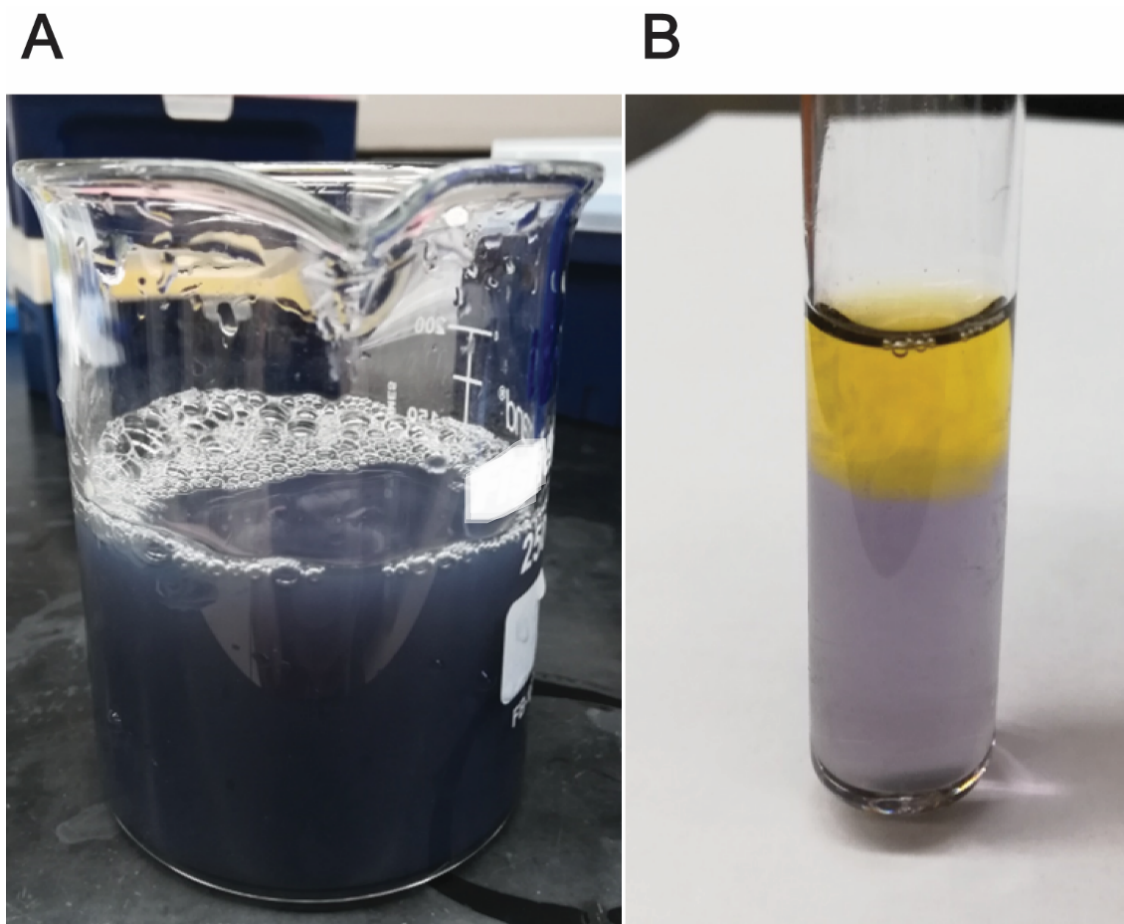

**Figure S3.** Color observed for BauF during purification. (A) BauF supernatant after cell lysis, prior to column loading. (B) Protein elution fraction collected during IMAC purification. The blue-gray fraction turned yellow over the period of minutes.

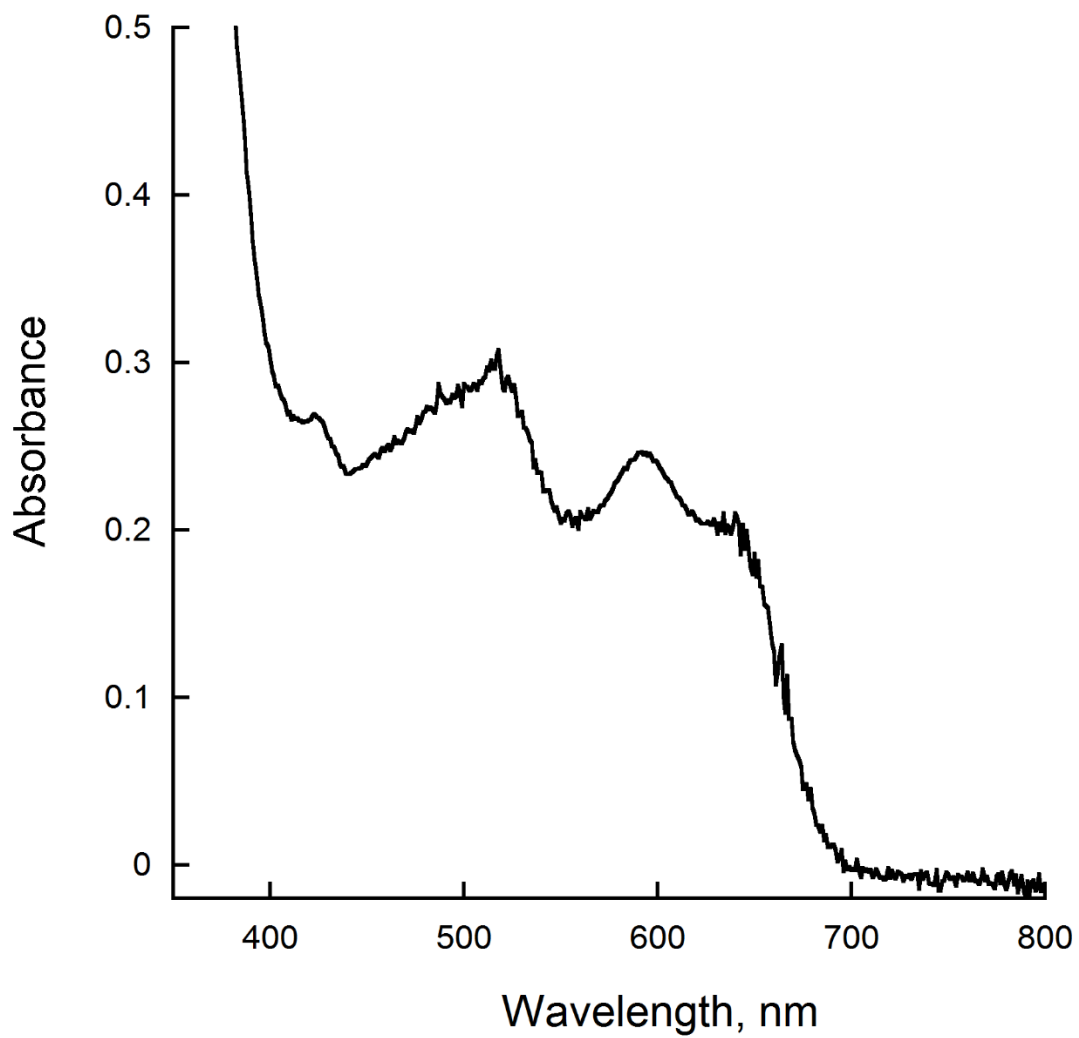

**Figure S4.** UV-Visible spectrum of the blue-gray protein elution fraction collected during IMAC purification.

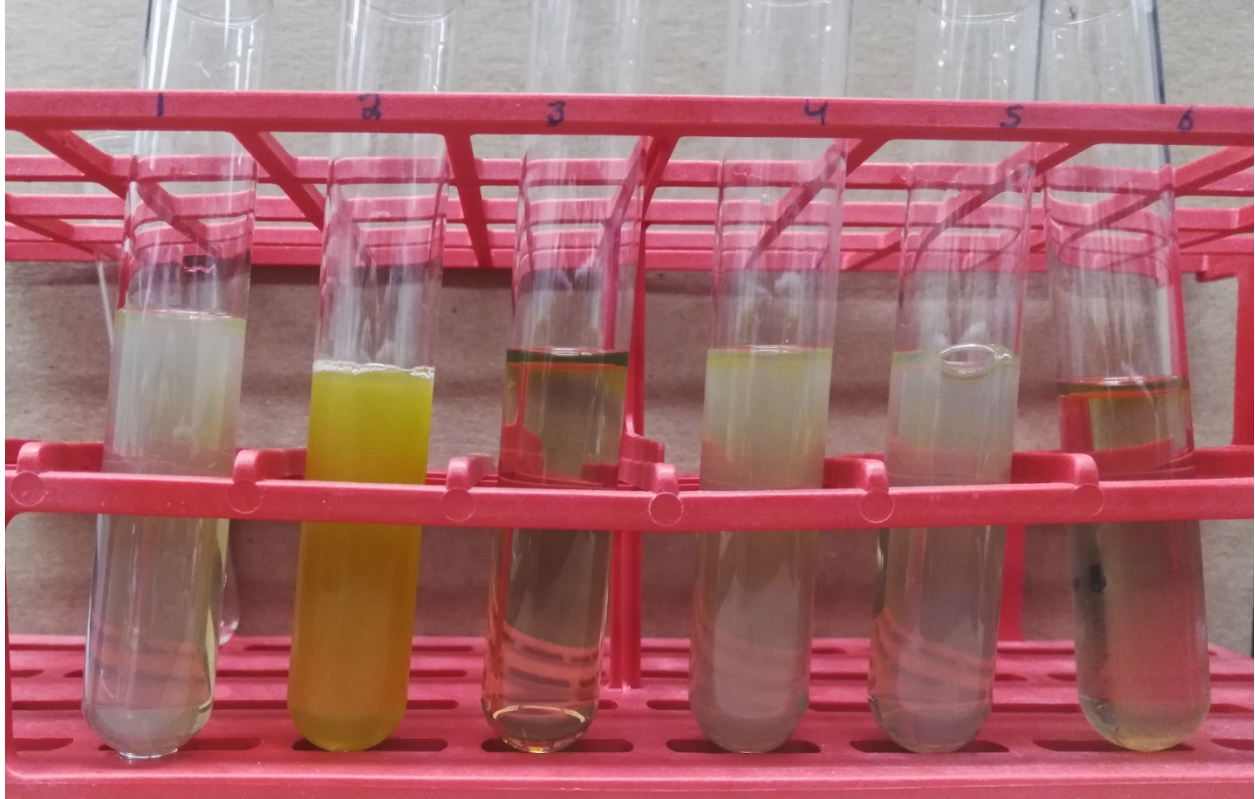

**Figure S5.** Supernatant of lysed ArticExpress *E. coli* cells expressing BauF. From left to right: 1) BauF supernatant in 25 mM HEPES pH 7.5, 300 mM NaCl, 10 mM imidazole; 2) supernatant after 10s vortexing; 3) supernatant supplemented with 1% Triton X-100; 4) supernatant supplemented with 1% TWEEN 20; 5) supernatant supplemented with 10 mM TCEP; 6) supernatant supplemented with 1% Triton X-100 and 10 mM TCEP.

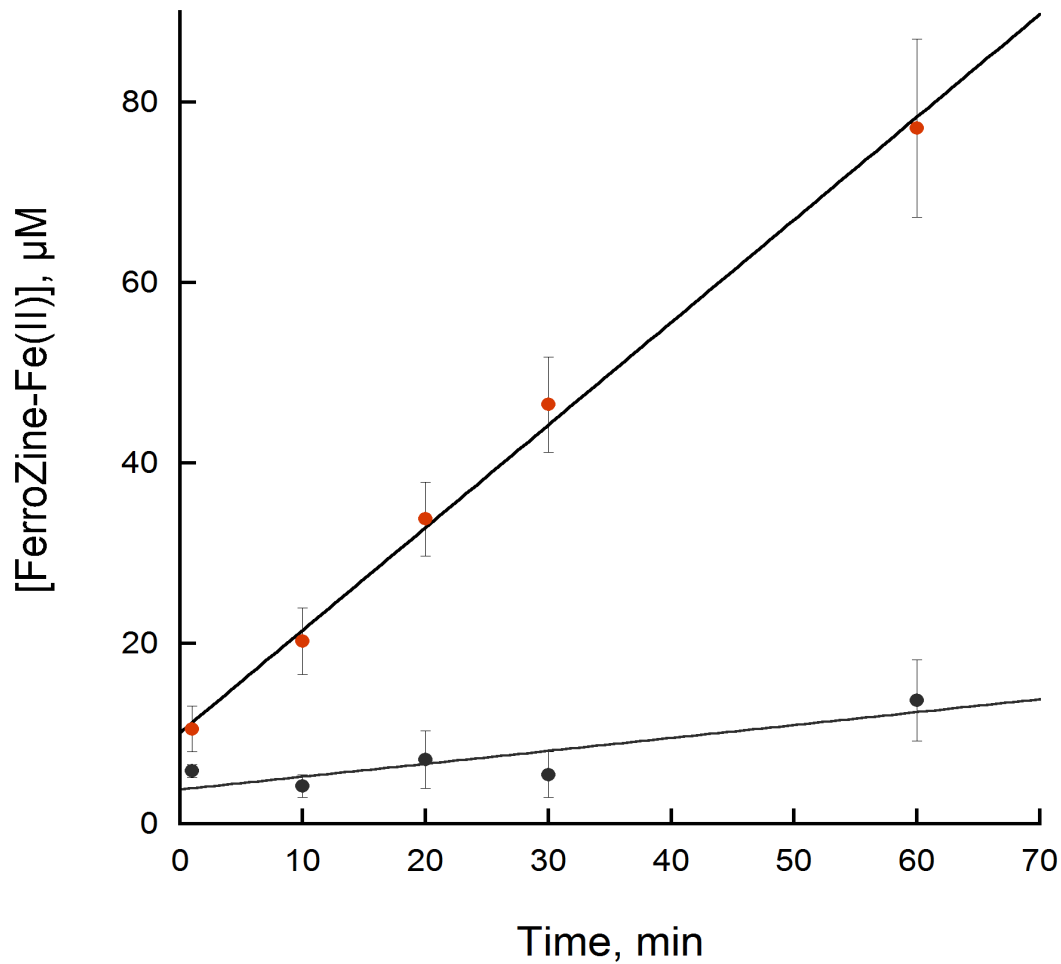

**Figure S6.** Detection of FerroZine-Fe<sup>+2</sup> complex formation at 560 nm. The reactions contained 15 µM BauF, 0.4 mM Acb-Fe, and 1 mM NADH (*red*) or no NADH (*black*). The determined rates were  $2 \times 10^{-4} \pm 5 \times 10^{-5} \text{ s}^{-1}$  (*black*) and  $1 \times 10^{-3} \pm 3 \times 10^{-4} \text{ s}^{-1}$  (*red*). Activity with NADPH was similar to NADH (not shown).
